# Supplementary material for: Single nuclei chromatin accessibility and transcriptomic map of breast tissues of women of diverse genetic ancestry
Source: Research Square preprint supplement (doi:10.21203/rs.3.rs-3411051/v1), 2023-10-09
Supplement: Supplementary file 3 [file 312faf863ccc91dd8d7212ee.docx]

| **Genetic ancestry/mutation** | **Number of samples** | **Number of nuclei/cell** | **Number of gene per nuclei/cell** |
| --- | --- | --- | --- |
| Ashkenazi | 22 | 13,959 | 1246 |
| Asian | 10 | 3,178 | 1,689 |
| European-non-Ashkenazi | 20 | 13,269 | 1,162 |
| Hispanic-White | 10 | 4,116 | 1,112 |
| Indigenous American | 10 | 10,575 | 1,251 |
| BRCA1 | 6 | 4695 | 735 |
| BRCA2 | 5 | 1575 | 653 |
| African American* | 10 | 17444 | 1215 (median) |
| European* | 10 | 19194 | 1257 (median) |

**Table S2: Number of donor tissues, nuclei and transcripts per nuclei in each group.**

* snRNA-seq only
